# Supplementary material
Source: PubMed Central journal article supplement (PMC5931126)
Supplement: jciinsight-3-99676-s002.pdf [file jciinsight-3-99676-s002.pdf]

**Supplemental Table S1. Real-time PCR primer sequences.**

| Mouse         | Forward                 | Reverse                 |
|---------------|-------------------------|-------------------------|
| CDO1 (pair 1) | GGGGACGAAGTCAACGTGG     | ACCTGTATTGATCGAATTTGGCA |
| CDO1 (pair 2) | GGGGACGAAGTCAACGTGG     | ACCCAGCACAGAATCATCAG    |
| CDO1 (pair 3) | GGCACGGCAGCAGTATTCAT    | GCCAGTCAAACAATGTCTCCTTT |
| CSAD          | GGGACTTGGCACCGACAGT     | GGGATCATCCTCCCTCTCTCA   |
| CYP7A1        | GGGATTGCTGTGGTAGTGAGC   | GGTATGGAATCAACCCGTTGTC  |
| SHP           | TGGGTCCCAAGGAGTATGC     | GCTCCAAGACTTCACACAGTG   |
| GCLC          | GGGGTGACGAGGTGGAGTA     | GTTGGGGTTTGTCTCTCCC     |
| GCLM          | AGGAGCTTCGGGACTGTATCC   | GGGACATGGTGCATTCCAAAA   |
|               |                         |                         |
| Human         | Forward                 | Reverse                 |
| CDO1          | TCCATTGGCTTACATCGAGTAGA | CCCGAAGTTGCATTTGGAGT    |
| CYP7A1        | GAGAAGGCAAACGGGTGAAC    | GGATTGGCACCAAATTGCAGA   |
| SHP           | GTGCCCAGCATACTCAAHAAG   | TGGGTCTGTCTGGCAGTT      |
